# Supplementary material for: Auxin and nitric oxide control indeterminate nodule formation
Source: PubMed Central journal article supplement (PMC1878477; doi:10.1186/1471-2229-7-21), 2007-05-08
Supplement: 1471-2229-7-21-S1.pdf [file 1471-2229-7-21-S1.pdf]

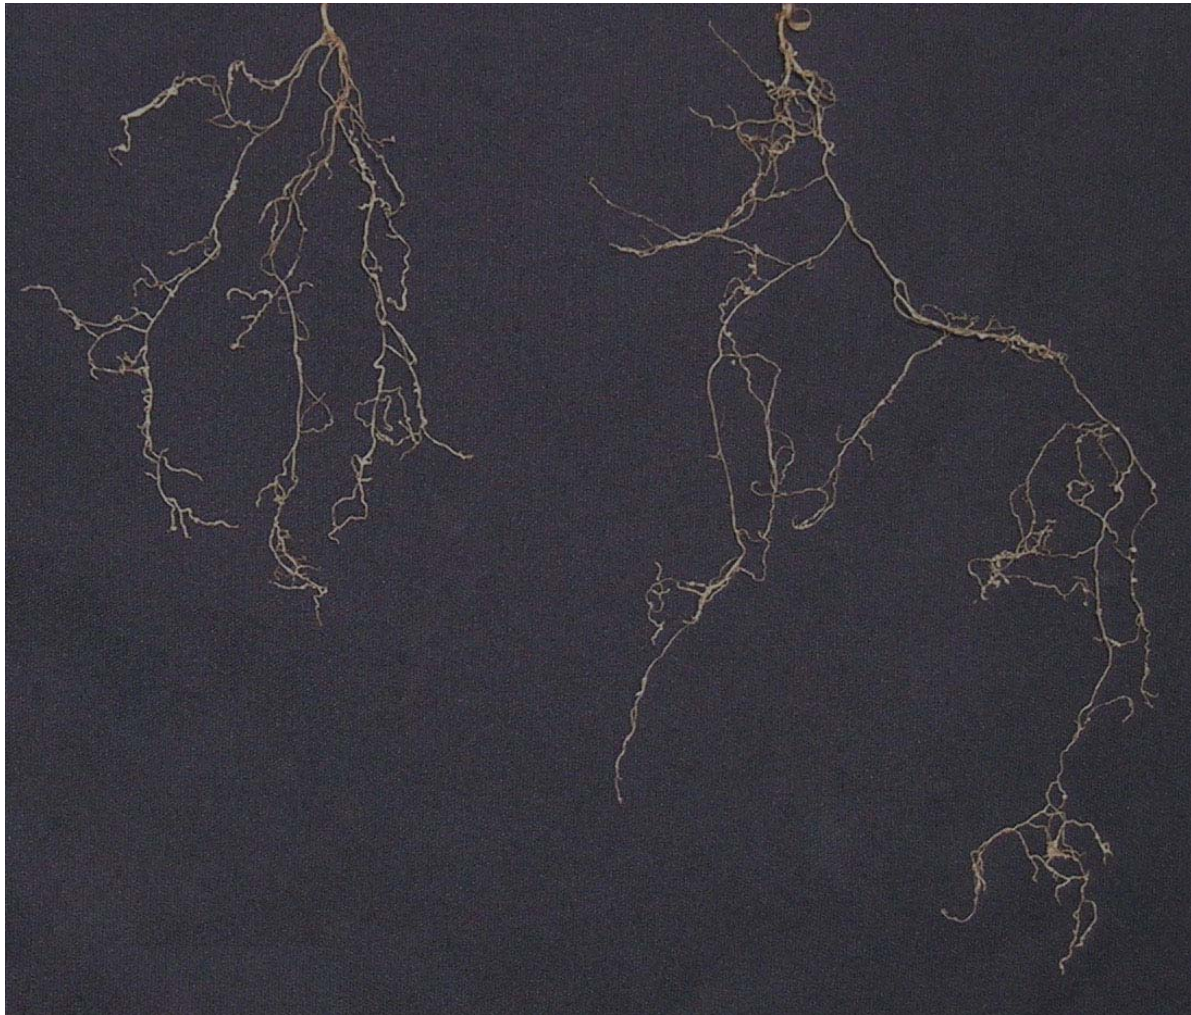

*M. truncatula* roots of plants nodulated by the control strain (left) and roots of plants nodulated by the IAA strain (right).
