# Supplementary material for: Auxin and nitric oxide control indeterminate nodule formation
Source: PubMed Central journal article supplement (PMC1878477; doi:10.1186/1471-2229-7-21), 2007-05-08
Supplement: 1471-2229-7-21-S2.pdf [file 1471-2229-7-21-S2.pdf]

*M. truncatula*  
control strain

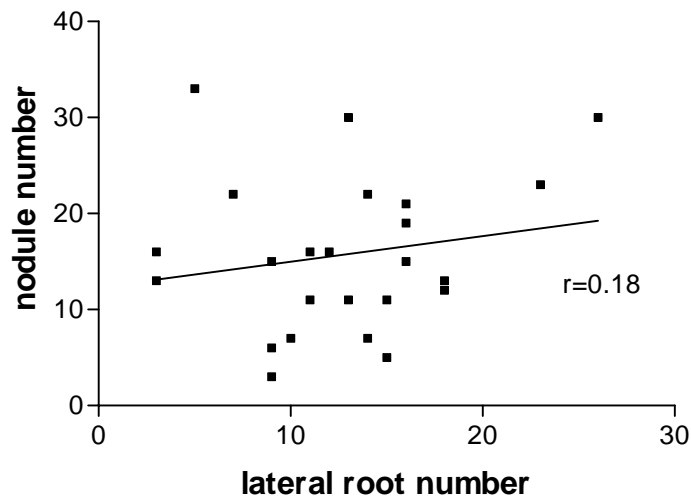

*M. truncatula*  
IAA strain

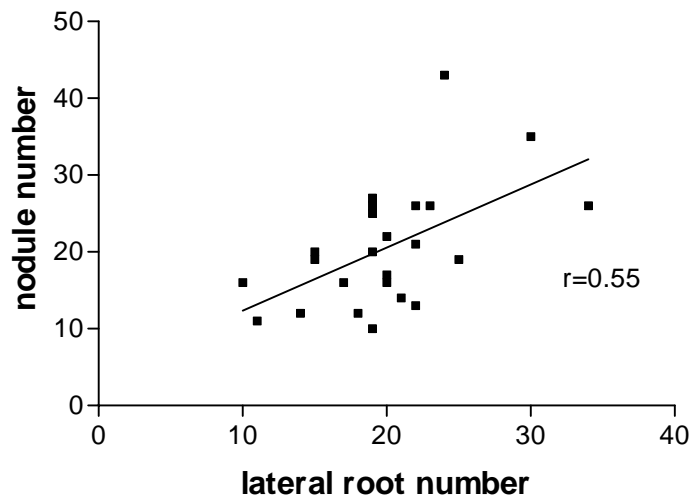

Correlation between the number of nodules present on lateral roots and the number of lateral roots developed by *Medicago truncatula* plants inoculated with IAA and control strain. Nodule and lateral root numbers are significantly correlated ( $P < 0.01$ ) only in plants inoculated by IAA strain.
